# Supplementary material for: Exploring the biosynthetic pathway of lignin in Acorus tatarinowii Schott using de novo leaf and rhizome transcriptome analysis
Source: PubMed Central journal article supplement (PMC8200657; doi:10.1042/bsr20210006), 2021-06-11
Supplement: BSR-2021-0006_supp.pdf [file BSR-2021-0006_supp.pdf]

# Exploring the biosynthetic pathway of lignin in *Acorus tatarinowii* Schott using *de novo* leaf and rhizome transcriptome analysis

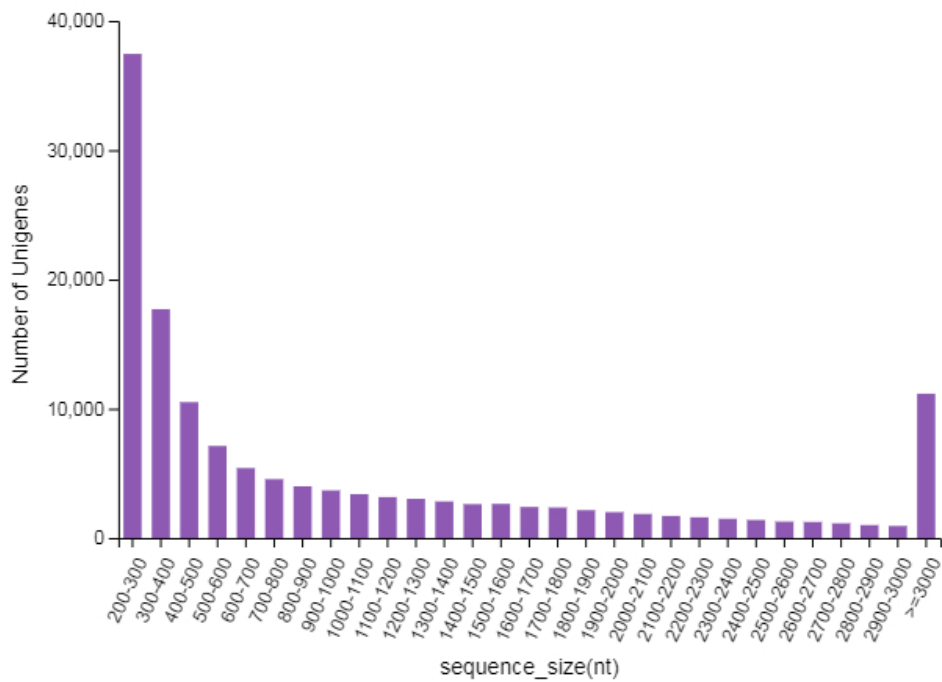

**Supplementary Figure S1** Length distribution of the assembled transcript sequences of *Acorus tatarinowii* Schott .

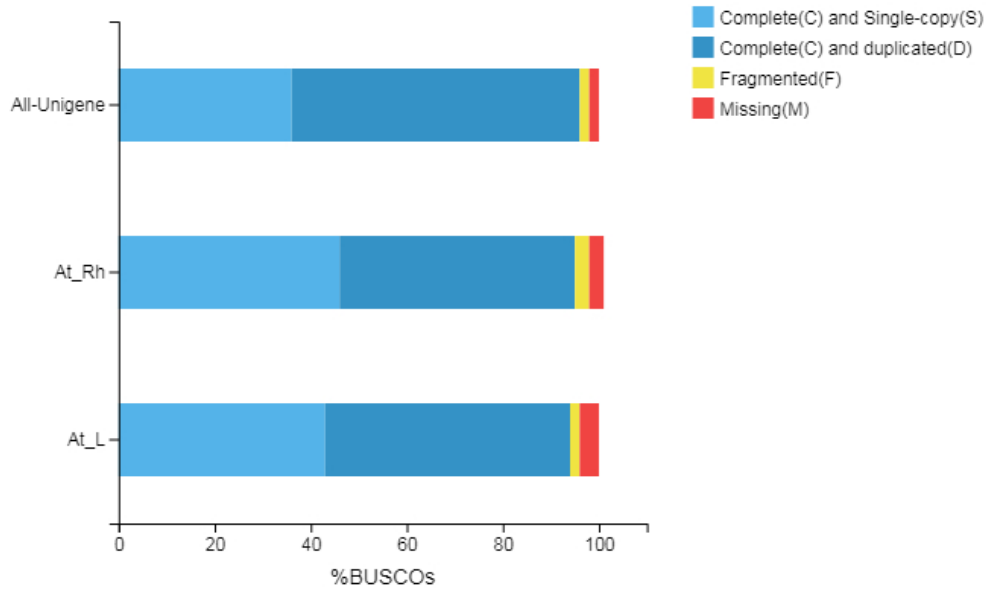

**Supplementary Figure S2** Match the sequence of the BUSCO database; F (fragmented): only part of the sequence can be compared to the BUSCO database; D (duplicate): multiple genes are aligned with the same BUSCO; M (missing) is filtered out of the sequence.

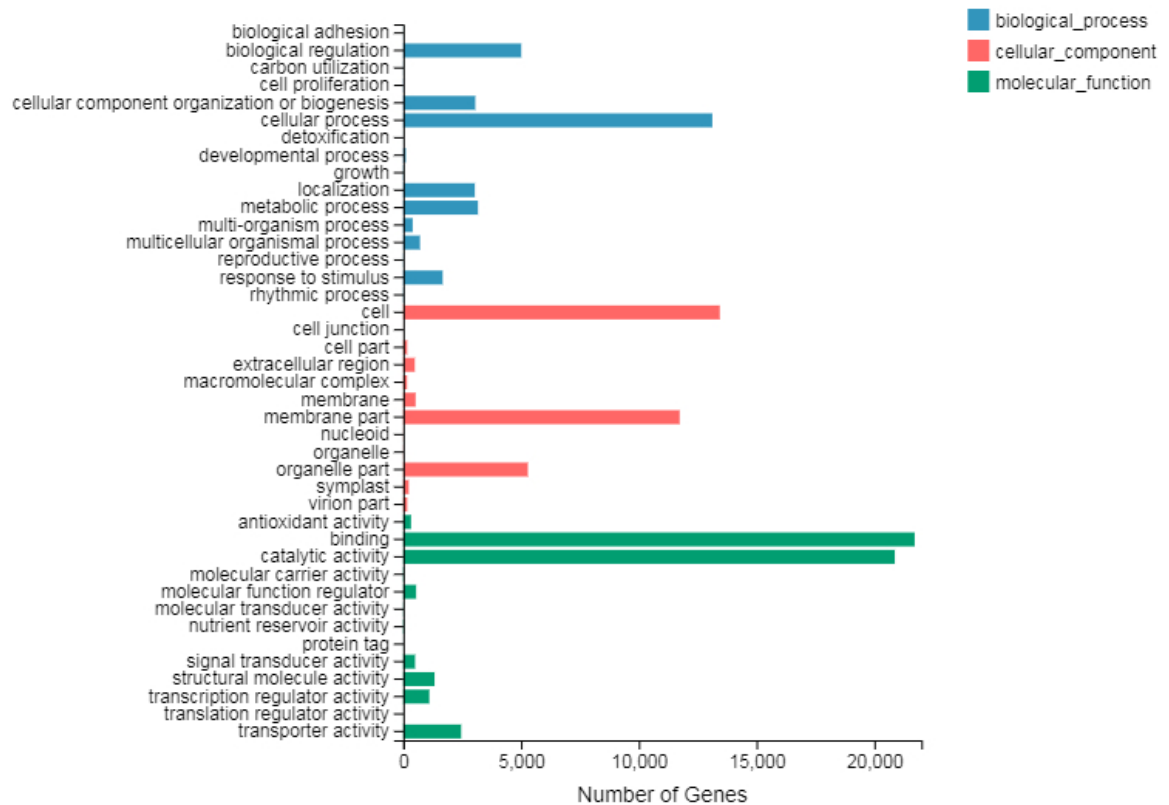

**Supplementary Figure S3** GO function classifications of *Acorus tatarinowii* Schott transcriptome.

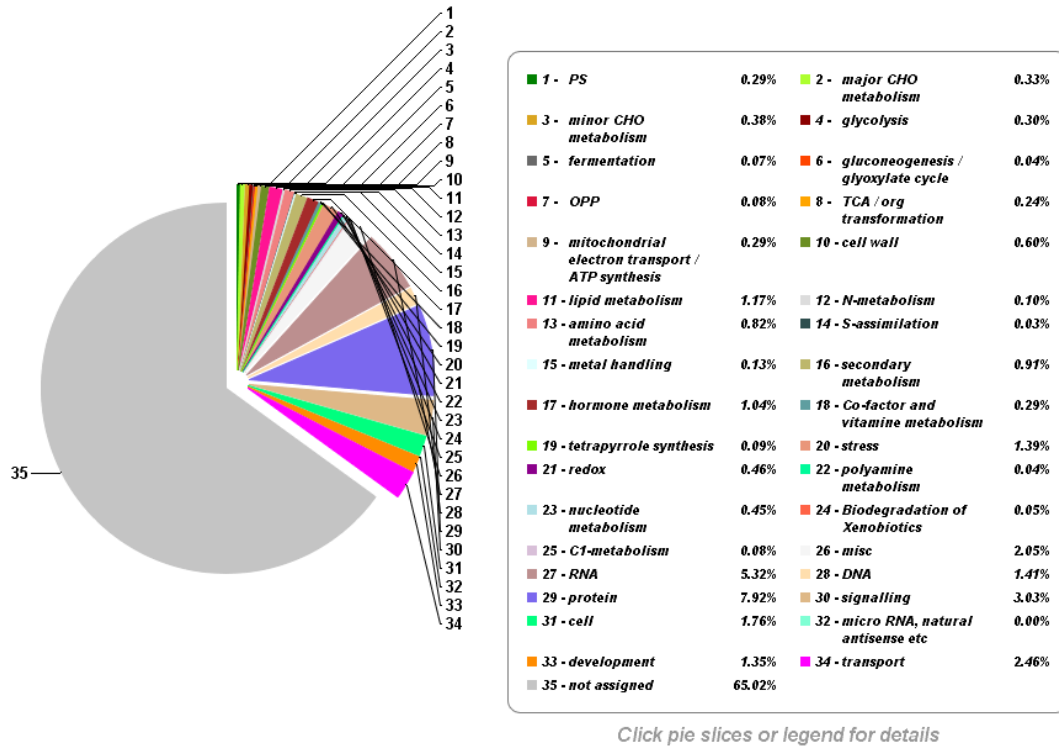

**Supplementary Figure S4** Annotation of unigenes in *Acorus tatarinowii* Schott using MAPMAN software.

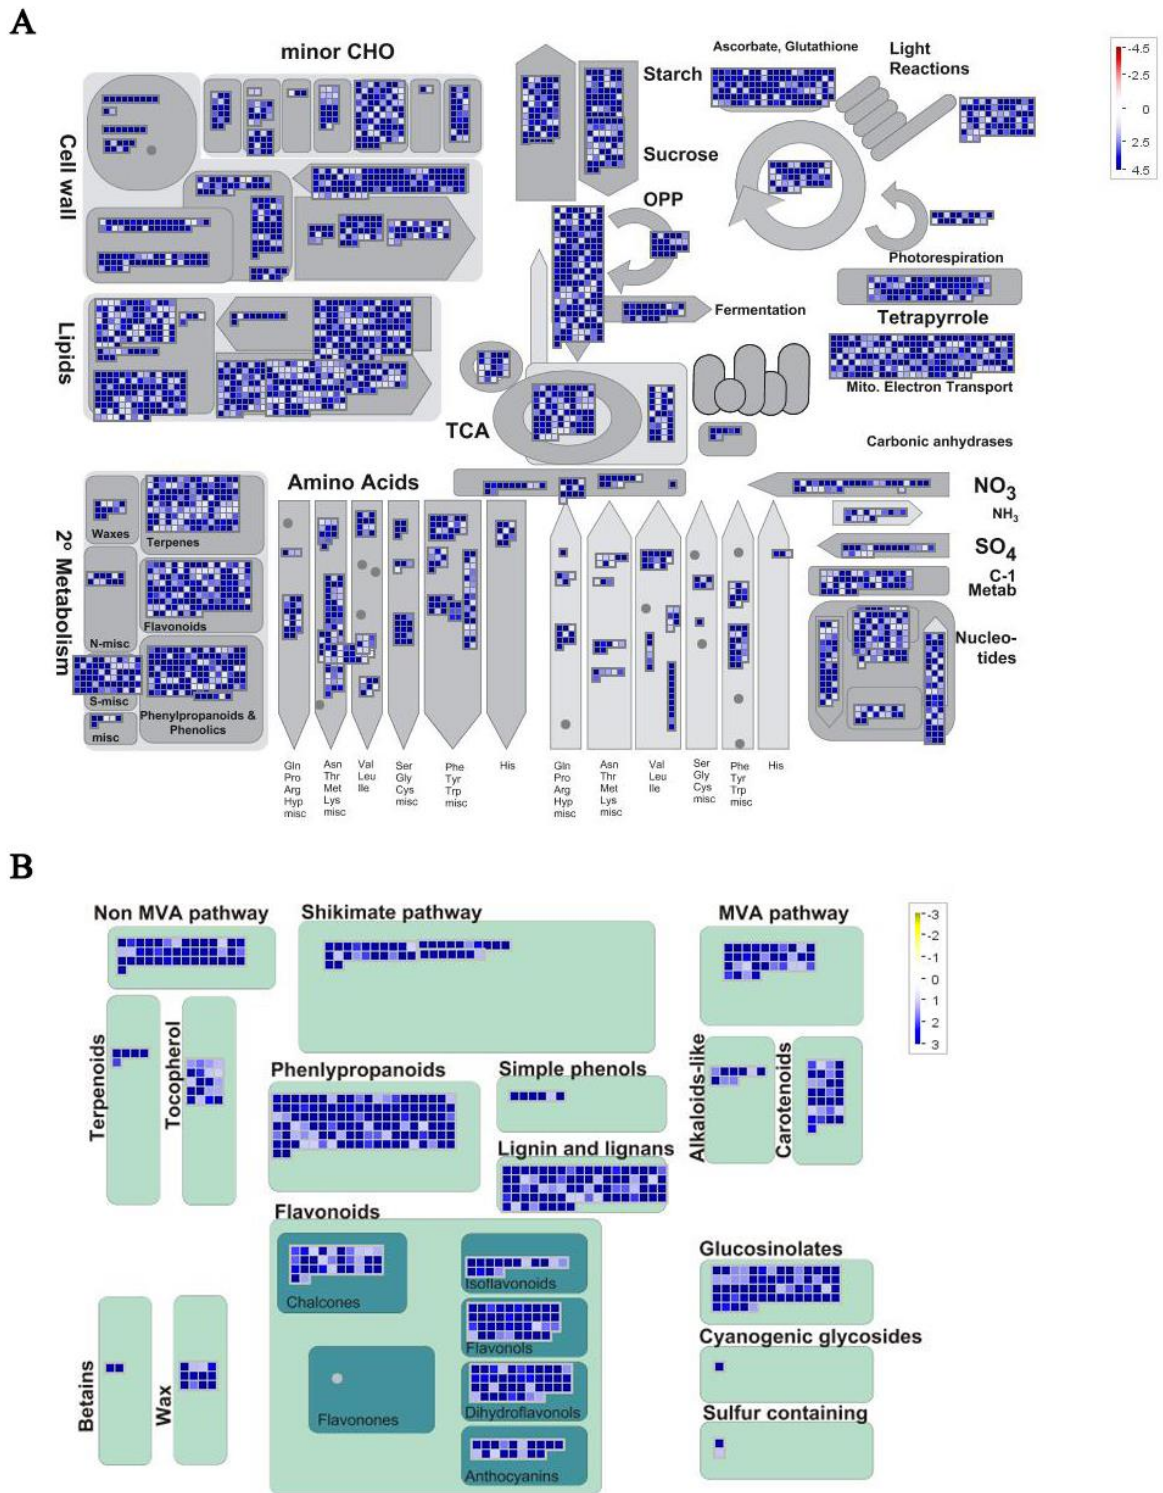

**Supplementary Figure S5** Overview of metabolism and secondary metabolic pathways in *Acorus tatarinowii* Schott using MAPMAN analysis. (A) overview of metabolism (B) secondary metabolic pathways

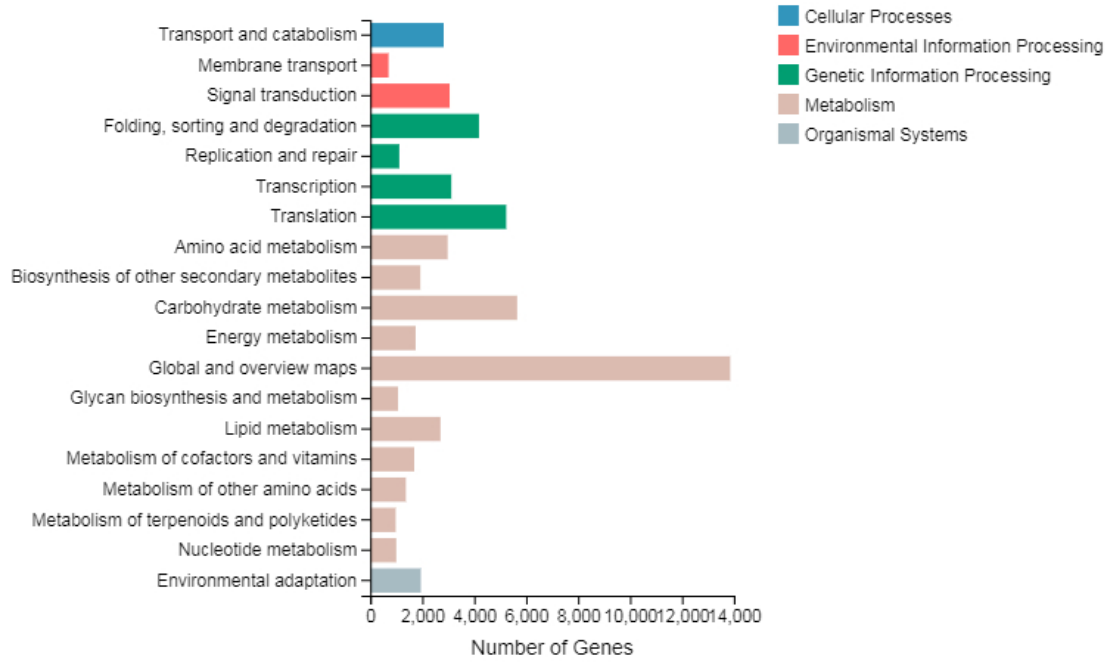

**Supplementary Figure S6** KEGG functional annotated in *Acorus tatarinowii* Schott.

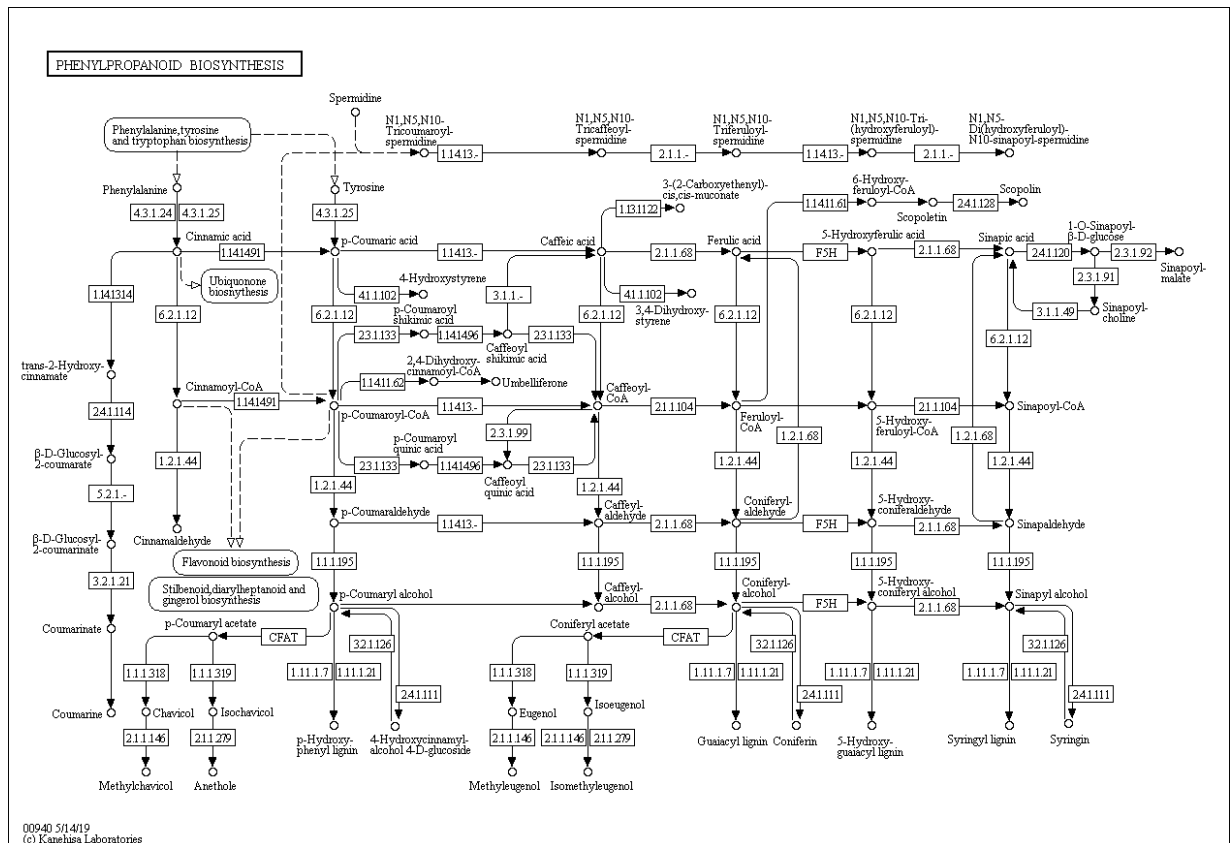

**Supplementary Figure S7** Phenylpropanoid biosynthesis in *Acorus tatarinowii* Schott based on the KEGG database.

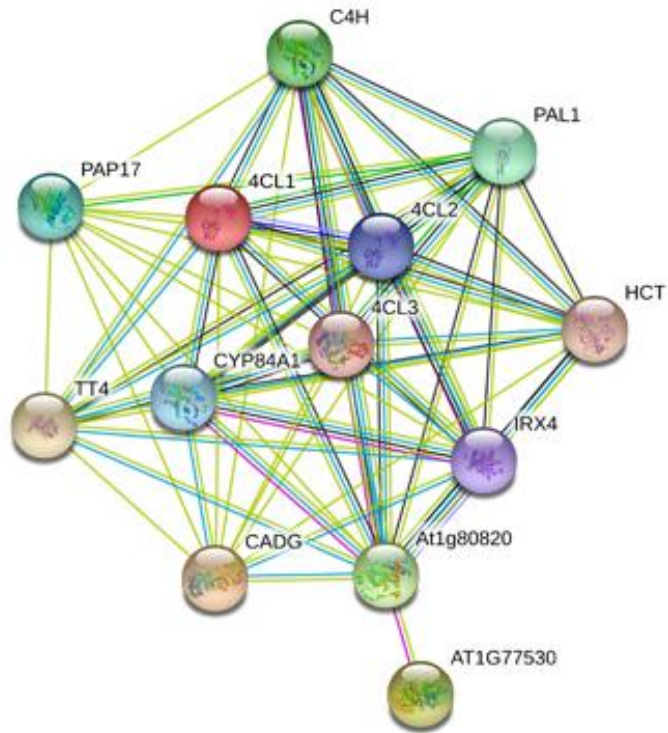

**Supplementary Figure S8.** Protein–protein interaction network diagram of the node proteins.

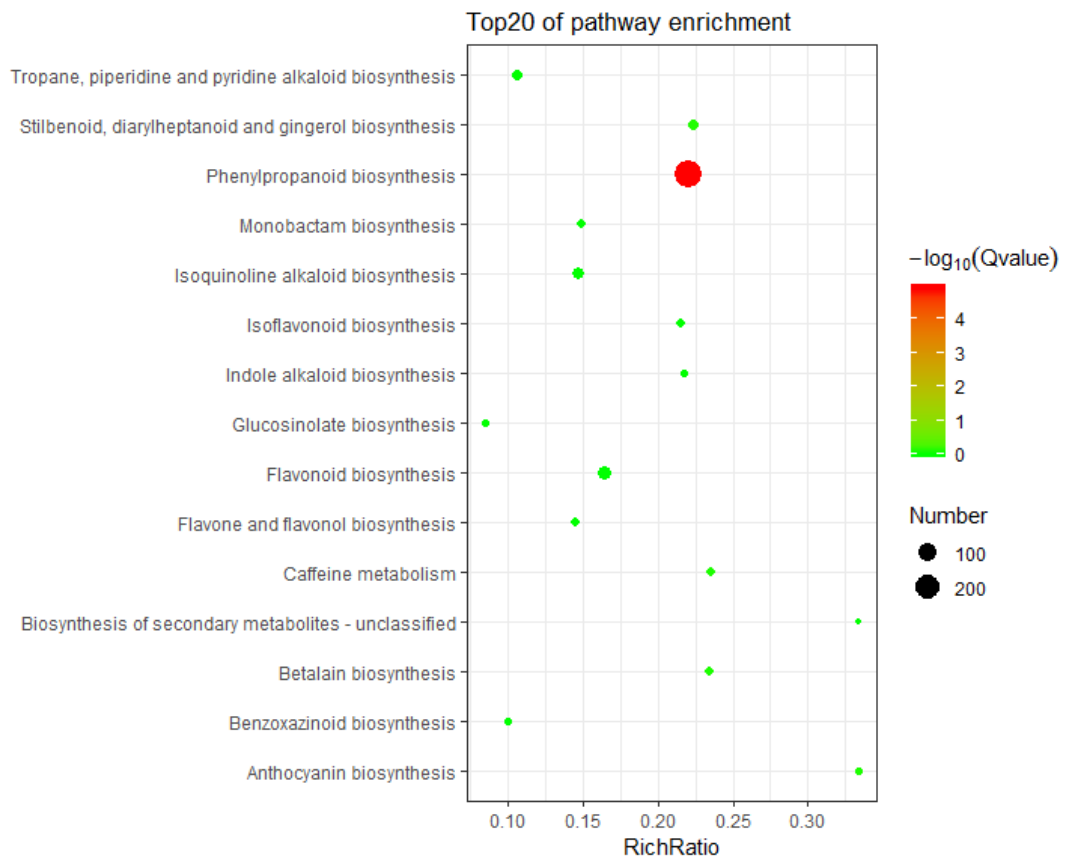

**Supplementary Figure S9** KEGG classification of specific expression up-regulated unigenes in *Acorus tatarinowii* Schott rhizome tissue.

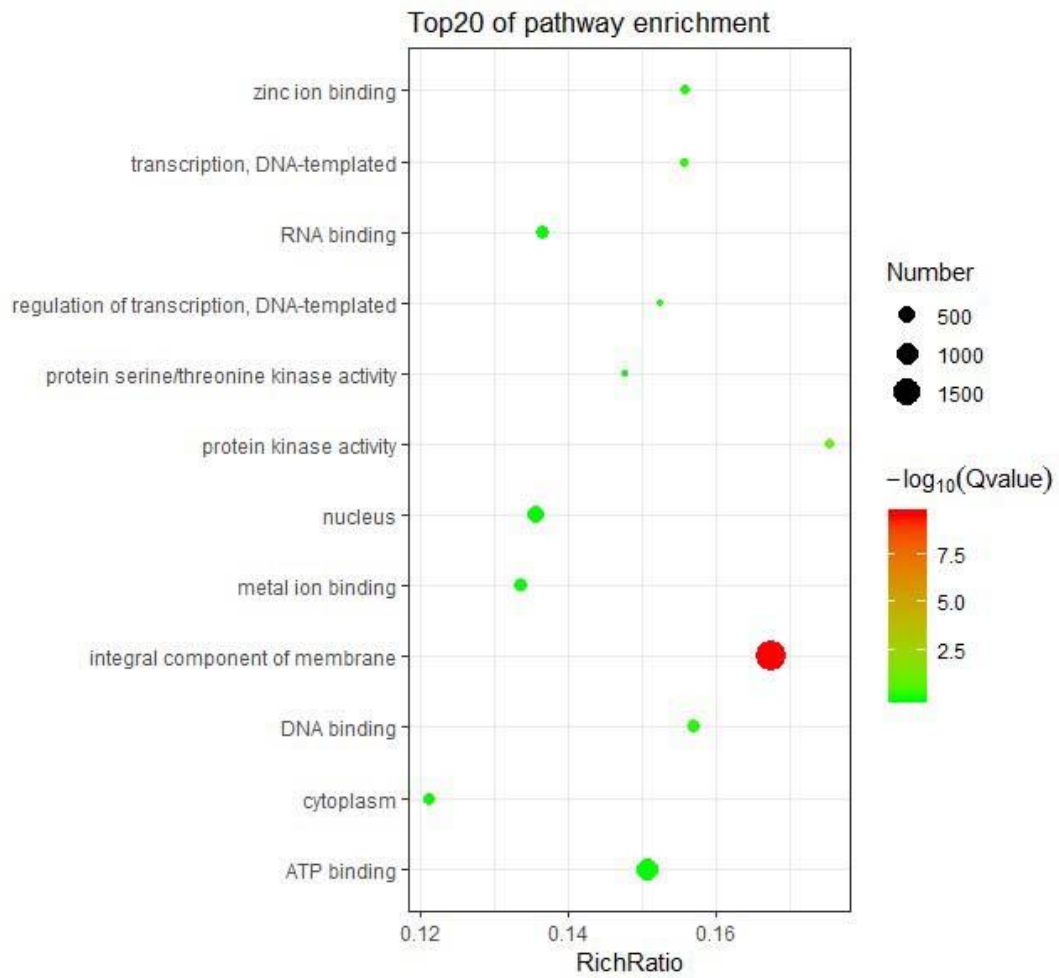

**Supplementary Figure S10** GO classification of specific expression up-regulated unigenes in *Acorus tatarinowii* Schott rhizome tissue.

**Supplementary Table S1** Annotation of the 13 key node proteins.

| <b>Node protein</b> | <b>Node accession</b> | <b>Node protein annotation</b>                             |
|---------------------|-----------------------|------------------------------------------------------------|
| PAL                 | AT2G37040.1           | phenylalanine ammonia-lyase1 (PAL1)                        |
| C4H                 | AT2G30490.1           | trans-cinnamate 4-monooxygenase (C4H)                      |
| F5H                 | AT4G36220.1           | Ferulic acid 5-hydroxylase 1(CYP84A1)                      |
| 4CL                 | AT1G51680.1           | 4-coumarate-CoA ligase1 (4CL1)                             |
| 4CL                 | AT3G21240.1           | 4-coumarate-CoA ligase 2 (4CL2)                            |
| 4CL                 | AT1G65060.1           | 4-coumarate-CoA ligase 3 (4CL3)                            |
| CCR                 | AT1G80820.1           | cinnamoyl-CoA reductase 2 (AT1G80820)                      |
| CAD                 | AT1G72680.1           | probable cinnamyl alcohol dehydrogenase 1 (CADG)           |
| PAP17               | AT3G17790.1           | Purple acid phosphatase 17 (PAP17)                         |
| TT4                 | AT5G13930.1           | chalcone and stilbene synthase family protein (TT4)        |
| HCT                 | AT5G48930.1           | quinate hydroxycinnamoyltransferase (HCT)                  |
| COMT                | AT1G77530             | putative caffeic acid 3-O-methyltransferase<br>(AT1G77530) |
| CCR                 | AT1G15950.1           | cinnamoyl-CoA reductase 1 (IRX4)                           |



**Supplementary Table S2** The detail of TFs involved in lignin biosynthesis.

| <b>Gene ID</b>      | <b>At_L FPKM</b> | <b>At_Rh FPKM</b> | <b>TFs</b> | <b>Enzyme</b> |
|---------------------|------------------|-------------------|------------|---------------|
| Unigene512_All      | 4.46             | 4.62              | zf-HD      | peroxidase    |
| CL2346.Contig3_All  | 1.32             | 1.36              | Trihelix   | peroxidase    |
| CL2346.Contig4_All  | 3.75             | 11.65             | Trihelix   | peroxidase    |
| CL2346.Contig5_All  | 3.38             | 9                 | Trihelix   | peroxidase    |
| CL7328.Contig1_All  | 6.65             | 5.66              | Trihelix   | peroxidase    |
| CL7328.Contig2_All  | 4.52             | 3.19              | Trihelix   | peroxidase    |
| CL9059.Contig2_All  | 34.39            | 49.4              | Trihelix   | peroxidase    |
| CL9059.Contig7_All  | 68.56            | 95.23             | Trihelix   | peroxidase    |
| Unigene5246_All     | 6.85             | 15.12             | Trihelix   | peroxidase    |
| Unigene2027_All     | 2.56             | 1.69              | OFP        | peroxidase    |
| CL1197.Contig10_All | 101.83           | 74.89             | MYB        | peroxidase    |
| CL1197.Contig1_All  | 28.04            | 23.77             | MYB        | peroxidase    |
| CL1197.Contig2_All  | 10.24            | 3.2               | MYB        | peroxidase    |
| CL1197.Contig8_All  | 10.78            | 28.32             | MYB        | peroxidase    |
| Unigene19075_All    | 1.31             | 1.83              | C2C2-Dof   | peroxidase    |
| Unigene1694_All     | 62.9             | 45.09             | bHLH       | peroxidase    |

**Supplementary Table S3** Quantitative Real-Time PCR (qRT-PCR) primers and conditions.

| <b>Genbank Accession</b> | <b>Primer Sequences (5' to 3')</b> | <b>Annealing (°C)</b> |
|--------------------------|------------------------------------|-----------------------|
| Unigene12762             | TGACCTTGAAGTACCCCATTGA             | 58                    |
|                          | GAAGCATAGAGGGAAAGCACAG             |                       |
| CL4977-4                 | TCCTGATCTTCTCCTGCTCTTC             | 60                    |
|                          | TTTACTGAAGGCGGATTTGAGC             |                       |
| CL7903-2                 | TGAAGCTCAGCCGTGACAACATC            | 62                    |
|                          | TCCGTCATCGCCCACTCTATCG             |                       |
| CL6617-1                 | AATCCCAAACGGCTATCCATTG             | 58                    |
|                          | AAACTTGACAGCCATATGACCG             |                       |
| CL9267-1                 | CTTGCCTCTACTCCATGATCCT             | 60                    |
|                          | ACGTCAGTATTTTGTAGCTCGC             |                       |
| CL11361-1                | GAACACTCTCATGCAGGGCTA              | 59                    |
|                          | CCGTTAAGAGACCCGCTATGTA             |                       |
| CL11361-3                | GAGCTCATCCGGTTCTTGAAC              | 59                    |
|                          | CTTCCAGAAGCTCCCAACGAAT             |                       |
